# Supplementary material for: Drug-Associated QTc Prolongation in Geriatric Hospitalized Patients: A Cross-Sectional Study in Internal Medicine
Source: PubMed Central journal article supplement — Drugs Real World Outcomes. 2021 Apr 8;8(3):325–35. doi: 10.1007/s40801-021-00234-x (PMC8324728; doi:10.1007/s40801-021-00234-x), 2021-04-08
Supplement: 40801_2021_234_MOESM1_ESM.pdf [file 40801_2021_234_MOESM1_ESM.pdf]

## Drugs – Real World Outcomes

### **Drug-associated QTc prolongation in geriatric hospitalized patients: a cross-sectional study in internal medicine.**

Marco Rossi <sup>1,3\*</sup>, Federico Marzi <sup>1</sup>, Mariarita Natale <sup>1</sup>, Aristotele Porceddu <sup>1</sup>, Marco Tuccori <sup>2,3</sup>, Pietro Enea Lazzerini <sup>1</sup>, Franco Laghi-Pasini <sup>1†</sup>, Pier Leopoldo Capecchi <sup>1,3</sup>.

1. Department of Medical, Surgical and Neuroscience Sciences, University of Siena, Siena, Italy
2. Unit of Pharmacology and Pharmacovigilance, Department of Clinical and Experimental Medicine, University of Pisa, Pisa, Italy
3. Regional Tuscan Centre of Pharmacovigilance, Florence, Italy

<sup>†</sup> Retired

**Table 7** QT-prolonging drug-drug interactions (QT-DDIs) (n=1) according to CredibleMeds® risk category and mechanism.

| <b>QT-DDIs <sup>a</sup></b>           | <b>n<br/>(tot n=29)</b> | <b>List 1 <sup>b</sup></b> | <b>List 2 <sup>b</sup></b> | <b>List 3 <sup>b</sup></b> | <b>QT-DDI<br/>classification</b> |
|---------------------------------------|-------------------------|----------------------------|----------------------------|----------------------------|----------------------------------|
| <i>Alfuzosin - Amiodarone</i>         | 1                       | 1                          | 1                          | 0                          | PD                               |
| <i>Alfuzosin - Citalopram</i>         | 1                       | 1                          | 1                          | 0                          | PD                               |
| <i>Amiodarone - Fluticasone</i>       | 1                       | 1                          | 0                          | 0                          | PK                               |
| <i>Buprenorphine - Venlafaxine</i>    | 1                       | 0                          | 2                          | 0                          | PD                               |
| <i>Cilostazol - Lansoprazole</i>      | 1                       | 1                          | 0                          | 1                          | PK                               |
| <i>Citalopram - Lansoprazole</i>      | 1                       | 1                          | 0                          | 1                          | PK                               |
| <i>Citalopram - Metronidazole</i>     | 1                       | 1                          | 0                          | 1                          | PD                               |
| <i>Citalopram - Quetiapine</i>        | 1                       | 1                          | 0                          | 1                          | PD                               |
| <i>Citalopram - Trazodone</i>         | 1                       | 1                          | 0                          | 1                          | PD                               |
| <i>Clarithromycin - Metronidazole</i> | 1                       | 1                          | 0                          | 1                          | PD                               |
| <i>Domperidone - Salmeterol</i>       | 1                       | 1                          | 0                          | 0                          | PK                               |
| <i>Domperidone - Verapamil</i>        | 1                       | 1                          | 0                          | 0                          | PK                               |
| <i>Flecainide - Paroxetine</i>        | 1                       | 1                          | 0                          | 1                          | PK, PD                           |
| <i>Flecainide - Ranolazine</i>        | 1                       | 1                          | 0                          | 1                          | PK, PD                           |
| <i>Fluconazole - Metronidazole</i>    | 1                       | 1                          | 0                          | 1                          | PD                               |
| <i>Fluconazole - Ranolazine</i>       | 1                       | 1                          | 0                          | 1                          | PK, PD                           |
| <i>Leuprolide - Paroxetine</i>        | 1                       | 0                          | 1                          | 1                          | PD                               |
| <i>Levofloxacin - Posaconazole</i>    | 1                       | 1                          | 0                          | 1                          | PD                               |
| <i>Metronidazole - Paroxetine</i>     | 1                       | 0                          | 0                          | 2                          | PD                               |
| <i>Metronidazole - Ranolazine</i>     | 1                       | 0                          | 0                          | 2                          | PK                               |
| <i>Propafenone - Salmeterol</i>       | 1                       | 0                          | 0                          | 1                          | PK                               |
| <i>Quetiapine - Clarithromycin</i>    | 1                       | 1                          | 0                          | 1                          | PK, PD                           |
| <i>Quetiapine - Clomipramine</i>      | 1                       | 0                          | 1                          | 1                          | PD                               |
| <i>Quetiapine - Olanzapine</i>        | 1                       | 0                          | 0                          | 2                          | PD                               |
| <i>Quetiapine - Venlafaxine</i>       | 1                       | 0                          | 1                          | 1                          | PD                               |
| <i>Sertraline - Alfuzosin</i>         | 1                       | 0                          | 1                          | 1                          | PD                               |
| <i>Sertraline - Ciprofloxacin</i>     | 1                       | 1                          | 0                          | 1                          | PD                               |
| <i>Sertraline - Metronidazole</i>     | 1                       | 0                          | 0                          | 2                          | PD                               |
| <i>Zuclopenthixol - Amiodarone</i>    | 1                       | 1                          | 0                          | 0                          | PD                               |

<sup>a</sup> QT-DDIs: drug-drug interactions with a potential risk of QT-prolongation identified using IBM Micromedex Drugdex® drug interactions tool. <sup>b</sup> classification from <https://www.crediblemeds.org>; list 1: drugs with known risk of TdP; list 2: drugs with possible risk of TdP; list 3: drugs with conditional risk of TdP.
